# Supplementary material for: Pollination implications of the diverse diet of tropical nectar-feeding bats roosting in an urban cave
Source: PeerJ. 2018 Mar 26;6:e4572. doi: 10.7717/peerj.4572 (PMC5875395; doi:10.7717/peerj.4572)
Supplement: Supplemental Information 2 — Taxonomic assignation is based on BLAST results. [file peerj-06-4572-s002.xlsx]

## Sheet: Sheet1
Primer	Sequence	Family	Genus	Species	Local name	Origin of plants	Occurrence in faecal samples	Number of reads	BLAST result	BLAST Identity (%)	Names with 100% match	Genbank Accession Number	Remarks	Notes on flowering	Usage	References
ITS2	W1=2253; W2=867; W3=10105; W4=1711; W7=2015; W8=10275; W9=6196	Myrtaceae	Xanthostemon	chrysanthus	Golden Penda	introduced	7	30	matched to single species	100	Xanthostemon chrysanthus	KM064986	Small tree with masses of golden flowers.	Flower throughout the year.	Planted at roadside and as ornamental tree.	MA Nazarudin et al. (2014). Growth performance and flowering of Xanthostemon chrysanthus at two urban sites in Kuala Lumpur, Malaysia. Journal of Tropical Forest Science, 428-434. CM Boo, SYJ Chew, JWH Yong. 2014. Plants in Tropical Cities. 1st Edition. FSP Ng. 2010. Tropical Horticulture & Gardening. MPH, Malaysia.
ITS2	W3=10424; W7=6492; W9=6068; W10=19816	Sapotaceae	Manilkara	zapota	ciku	introduced	4	48	matched to single species	100	Manilkara zapota	KF686242; HF542846; JX856474	Tree. Fragrant flowers bloom at night (Mohd-Tamin, 1991).	Flowers and fruits throughout the year (Corner, 1997)	Edible fruits. Commercialised as crops. Latex were used to make chewing gums . Common in all orchards, villages and gardens (Corner, 1997).	N Mohd-Tamin. 1991. 100 Spesis tumbuhan di Malaysia. Jabatan Hal Ehwal Awam Syarikat-Syarikat Shell, Malaysia. pp. 101. EJH Corner. 1997. Wayside Trees of Malaya. United Selangor Press, Malaysia. Pp. 861.CM Boo, K Omar-Hor, CL Ou-Yang. 2006. 1001 Garden Plants in Singapore (2nd. Edition). National Parks, Singapore. Pp. 780. CM Boo, SYJ Chew, JWH Yong. 2014. Plants in Tropical Cities. 1st Edition.…
ITS2	W2=170; W9=9659; W10=10382	Fabaceae	Leucaena	leucocephala	Petai Jawa, Petai Belanda, Petai Tiga Bulan	introduced	3	11	matched to single species	100	Leucaena leucocephala	KP096012	All parts rather foetid. Flower-heads are cream white and fragrant. Petals are pale green. (Corner, 1997). Small bushy tree. Attracts birds.	Flowering and fruiting throughout the year (Corner, 1997).	Leaves and fruits are used as livestock feed and fertilizer. Stabilize embankments and cover exposed site. Rehabilitate areas for other plants to establish. Young shoots are eaten. (Ng 2010). Abundant in villages and waste-places. Planted at garden and roadsides. Young pods are eaten as vegetables by Malayas and raw seeds are said to be tasty (Corner, 1997).	N Mohd-Tamin. 1991. 100 Spesis tumbuhan di Malaysia. Jabatan Hal Ehwal Awam Syarikat-Syarikat Shell, Malaysia. pp. 101. EJH Corner. 1997. Wayside Trees of Malaya. United Selangor Press, Malaysia. Pp. 861. CM Boo, SYJ Chew, JWH Yong. 2014. Plants in Tropical Cities. 1st Edition. Pp.990. FSP Ng. 2010. Tropical Horticulture & Gardening. MPH, Malaysia. Pp.361.
ITS2	W1=1269; W8=13772	Amaranthaceae	Beta	vulgaris	Beet root	introduced	2	10	matched to single species	100	Beta vulgaris	KP748136; KP748146; KP748135; KP748137; KP748147; KP748134; HE577334; AY858597		Bloom seasonally during spring	As vegetable
ITS2	W8=1299; W10=11449	Asteraceae	Chrysanthemum		Bunga Kekwa	introduced	2	8	matched to multiple species and cultivars	100	Chrysanthemum vestitum; Chrysanthemum lavandulifolium; Chrysanthemum indicum; Chrysanthemum yoshinaganthum; Chrysanthemum x shimotomaii; Chrysanthemum okiense; Chrysanthemum zawadskii; Chrysanthemum rhombifolium	KC694560; KC694553; KC694551; KC694550; KC694503; KC694504; KC694505; KC694455; KC694435; KC694454; EF091598; EF091596; EF091589; KX394604; KC694538	Hybrids in Peninsular Malaysia.	Flower throughout the year.	Ornamental flower. Commercialised as garden plants.	FSP Ng. 2010. Tropical Horticulture & Gardening. MPH, Malaysia. Pp.361.
ITS2	W6=10740; W10=24279	Lythraceae	Punica	granatum	Delima, Pomegranate	introduced	2	5	matched to single species	100	Punica granatum	JX911350; JX911348; JX911347; JX911346; JX911339; JX911338; JX911337; FM887005	Shrub or small tree. Peculiar red or white flowers with large fleshy fruit.	Flower throughout the year.	Common in villages (Corner, 1997). Some varieties have been bred for fruits and ornamental flowers (Ng, 2010). Cultivated for fruits as crops. Commnly planted at backyard.	EJH Corner. 1997. Wayside Trees of Malaya. United Selangor Press, Malaysia. Pp. 861. FSP Ng. 2010. Tropical Horticulture & Gardening. MPH, Malaysia.
ITS2	W5=2399	Rubiaceae	Oldenlandia	corymbosa	Siku-Siku	introduced	1	3	matched to single species	100	Oldenlandia corymbosa	HQ148802; HQ148758; JF837604; JF837603; AM939501; AM939500; HQ148840; HQ148817	Shrubs. Small flowers. Corolla is white or pale purple.	Flower continuously	Herbs & spices. Weeds.	CM Boo, K Omar-Hor, CL Ou-Yang. 2006. 1001 Garden Plants in Singapore (2nd. Edition). National Parks, Singapore. Pp. 780. CM Boo, SYJ Chew, JWH Yong. 2014. Plants in Tropical Cities. 1st Edition. Pp.990.
ITS2	W9=10982	Apiaceae	Foeniculum	vulgare	Adas Pedas	introduced	1	3	matched to single species	100	Foeniculum vulgare	KP682406; KP406140; JF421498; HQ377213; HQ377212; HQ377210; FJ980395; KX165868; HQ377209; EU79689	Herbs		Maybe be planted at backyard for use in cooking. Used in traditional medicine.	Zakaria, M. (2010). Traditional Malay medicinal plants. ITBM.
ITS2	W6=14631	Myrtaceae	Eucalyptus			introduced	1	3	matched to two species which occur in Peninsular Malaysia. Cultivars are planted in Peninsular Malaysia.	100	Eucalyptus microtheca; Eucalyptus porosa	KT186365; HM116969			Cultivated for timber and oil. Can be found in gardens.	EJH Corner. 1997. Wayside Trees of Malaya. United Selangor Press, Malaysia. Pp. 861.
ITS2	W8=2096	Apiaceae	Cuminum	cyminum	Jintan Putih, Cumin	introduced	1	1	matched to single species	100	Cuminum cyminum	KX108698; KR150150; KF454473; KF454474; KF454477; KP40614; HM176650; HM176651; HM176652; HM176653; HM176654; HM176655;	Perennial herb		Used in traditional medicine	Zakaria, M. (2010). Traditional Malay medicinal plants. ITBM.
ITS2	W4=2600; W7=11357; W8=22245	Caricaceae	Carica	papaya	Papaya, Betik	introduced; introduced and cultivated	3	11	matched to single species	100	Carica papaya	KX108701; KP406147; KC984643	Dioecious. Flowers very fragrant and blooms at night for ~1 night during which they are visited by moths.	Flower throughout the year.	Garden plants. Cultivated for fruits.	EJH Corner. 1997. Wayside Trees of Malaya. United Selangor Press, Malaysia. Pp. 861.
ITS2	W1=3015; W2=2013; W2=692; W3=12141; W4=1390; W5=2634; W6=1064; W7=10577; W8=16457; W9=10030; W9=1398; W9=2479; W9=6717; W9=8797; W10=10067	Moraceae	Artocarpus	heterophyllus	Nangka, Jackfruit	introduced; introduced and has naturalised	10	7417	matched to single species	100	Artocarpus heterophyllus	KU855510; KU855508; KT002551; KU855507; KU855509; FJ917039; JX856537	Male flower heads emit strong scent of honey and burnt sugar which attract small flies and beetles which carry pollen to female flower heads (Corner, 1997). Medium tree with huge fruits which emit strong scent when ripe.	Seasonal. Flowers twice a year at January to February and July to August (Corner, 1997).	Cultivated as important crops for fruits. Planted as backyard tree.	KM Kochummen. 1978. Moraceae. In: Tree Flora of Malaya: a Manual for Foresters. (eds: TC Whitemore). Longman, Malaysia.Vol 3: 119-168. EJH Corner. 1997. Wayside Trees of Malaya. United Selangor Press, Malaysia. Pp. 861.
ITS2	W1=7079; W2=1102; W3=10015; W4=103; W5=107; W6=2261; W7=11626; W8=12833; W10=15371	Malvaceae	Ceiba	pentandra	Kapok, Kekabu, Kabu Kabu	introduced; introduced and has naturalised	9	485	matched to single species	100	Ceiba pentandra	EF432374; EF432375; KM453169; HQ658386; AY635500; AY63549; AY635497; AY635496	Dirty white flowers emit milky scent and bloom about twenty minutes after sunset and lasts overnight until the petals begin to drop about midday. Bat-pollinated due to the milky smell but also attract bees as dawn breaks.	Flower between November to February.	Commonly planted in villages. Cultivated for the wool from fruits which is used for stuffing cushions, pillows, mattresses and life-jackets. Planted as hedge. Young fruits can be eaten. Leaves and roots are medicinal.	A Start (1974). The feeding biology in relation to food sources of nectarivorous bats (Chiroptera: Macroglossinae) in Malaysia. Unpublished PhD Thesis, University of Aberdeen. EJH Corner. 1997. Wayside Trees of Malaya. United Selangor Press, Malaysia. Pp. 861.
ITS2	W2=1559; W3=10364; W4=1159; W8=14932; W10=10099	Anacardiaceae	Mangifera	indica	Mangga, Mempelam, Mango	introduced; introduced and has naturalised	5	82	matched to single species	100	Mangifera indica	AB598047; AB598049; AB598050; LN552225; KJ833765	Fragrant flowers which are yellow, white, pale cream or even pinkish.	Flower between April and June, and toward the end of the year. Sometimes small irregular flowering.	Commonly planted in villages and backyard for fruits. Also planted in gardens. Cultivated for fruits as crops.	EJH Corner. 1997. Wayside Trees of Malaya. United Selangor Press, Malaysia. Pp. 861.
ITS2	W7=14629; W9=3439	Asteraceae	Mikania	micrantha		introduced; introduced and has naturalised	2	7	matched to single species	100	Mikania micrantha	DQ826453; KU295355	Widespread weed. Climber. Attracts butterflies.	Flower continuously	Herbs & spice	CM Boo, SYJ Chew, JWH Yong. 2014. Plants in Tropical Cities. 1st Edition.
ITS2	W1=2562; W10=17351	Piperaceae	Piper	aduncum		introduced; introduced and has naturalised	2	4	matched to single species	100	Piper ossanum=Piper aduncum ; Piper aduncum	DQ868740; KF924116; AF275160	Shrub or treelet. Flowering spikes (Corner, 1997). Pollination is by insects, but poorly studies in Asia. Dispersal in Asia likely to be by birds and bats but poorly documentad (LaFrankie, 2010).	Flower throughout the year.	Naturalized and invasive on along roadsides. Recorded from Genting Highland (Corner, 1997; LaFrankie, 2010).	EJH Corner. 1997. Wayside Trees of Malaya. United Selangor Press, Malaysia. Pp. 861. JV LaFrankie. 2010. Trees of Tropical Asia. Black Tree Publications, Philippines. pp.748.
ITS2	W1=10008; W2=1030; W3=10033; W4=7390; W5=6913; W5=9082; W6=20197; W6=7676; W7=11166; W8=16331; W9=5176; W10=13619	Lythraceae	Duabanga	grandiflora	Berembang Bukit	native	10	12020	matched to single species	100	Duabanga grandiflora	KR532009; KR532008; KJ511909	Scattered in open places along rivers especially in hilly country. Lowlands and valleys (Whitmore, 1972). White flowers begin to bloom at 5 pm and are fully open at 7pm with powdery anthers and large drops of sweet, clear nectar around based of the ovary. Flowers smell faintly of sour milk but not as strong as Durio flowers. By sunrise next morning, petals and stamens have dropped off. It is poss…	Flower continuously (Start, 1974)	Young fruits are edible. Can be found at roadsides. Common at the back of Batu Caves, towards Ulu Yam.	TC Whitmore. 1972. Sonneratiaceae. In: Tree Flora of Malaya: a Manual for Foresters. (eds: TC Whitemore). Longman, Malaysia.Vol 1: 442-445. A Start (1974). The feeding biology in relation to food sources of nectarivorous bats (Chiroptera: Macroglossinae) in Malaysia. Unpublished PhD Thesis, University of Aberdeen. EJH Corner. 1997. Wayside Trees of Malaya. United Selangor Press, Malaysia. Pp. 861.
ITS2	W1=7110; W2=2600; W3=10938; W4=4790; W5=10403; W6=3703; W7=13660; W8=10160; W9=8948; W10=14129	Musaceae	Musa	balbisiana		native	10	1441	matched to single species	100	Musa balbisiana	KU512924; KT696445; KT696444; KT257613		Musa spp. appear to flower continously.	Cultivated for fruits as crops. Planted at backyard for fruits.	A Start (1974). The feeding biology in relation to food sources of nectarivorous bats (Chiroptera: Macroglossinae) in Malaysia. Unpublished PhD Thesis, University of Aberdeen.
ITS2	W1=3358; W2=1748; W3=10322; W4=1414; W4=7357; W6=15197; W7=14738; W7=3937; W7=739; W8=21819; W9=11645; W10=19790	Musaceae	Musa	acuminata	Pisang Surong, Pisang Karok	native	9	6350	matched to single species	100	Musa acuminata	KT257607; KY710763	Male flowers begin to open between 5pm to 8pm and fall at 10 am the next morning. Bract is dark crimson while flowers are whitish yellow. Nocturnal nectar production (Itino et al., 1991). Male flower are long and curved white smell peculiarly like cabbage (Musa, van der Pijl 1936). Recorded as M. malaccensis in Ridley (1924). Recorded from Kuala Lumpur, Selangor. Common in hill forests, often in …	Musa spp. appear to flower continously.	Fruits are edible and used by wild tribes but the pulp is scanty (Ridley, 1924).	HN Ridley - in Fl. Malay Penins. 1924: Vol 4, 294. A Start (1974). The feeding biology in relation to food sources of nectarivorous bats (Chiroptera: Macroglossinae) in Malaysia. Unpublished PhD Thesis, University of Aberdeen. Itino, T., Kato, M., & Hotta, M. (1991). Pollination ecology of the two wild bananas, Musa acuminata subsp. halabanensis and M. salaccensis: chiropterophily and ornithophil…
ITS2	W3=10310; W3=11438; W3=12056; W3=12907; W3=2242; W3=4467; W3=5148; W3=5615; W4=5143; W5=1109; W6=15067; W6=17296; W7=6770; W8=13195; W8=19404; W8=3894; W9=8855	Myrtaceae	Syzygium	samarangense	Jambu Air, Java Apple, Wax Apple	native	7	2925	matched to single species	100	Syzygium samarangense	KC815987; KC815986; KC800610; KC815990; KC815988	White flowers.	Generally flower from February to April	Cultivated for fruits as crops. Planted at backyard for fruits.	EJH Corner. 1997. Wayside Trees of Malaya. United Selangor Press, Malaysia. Pp. 861.
ITS2	W1=1257; W2=1076; W3=10053; W4=1561; W7=13639; W9=10067; W10=18420	Bignoniaceae	Oroxylum	indicum	Beka, Bulai, Bonglai, Merlai, Midnight Horror	native	7	441	matched to single species	100	Oroxylum indicum	JN407437; JN407439; KC441042; KC441043; FJ606747	Monotypic. Tree. Bat-pollinated. Early successional plants. Flowers have pungent smell and open at night, starting at 10pm. By midnight, the flowers are completely open and is filled with stink. Before sunrise, the corrolla detached and slips off over the long style. Pollinated by bats which are attracted by the smell (Corner, 1997).	Mostly flower between June to September, though irregular flowering patterns have been observed from May to October, from February to June and February to October for those in human dominated area.	Traditional medicine. Young shoots may be cooked and eaten. Common in villages and by rice-fields.	A Start (1974). The feeding biology in relation to food sources of nectarivorous bats (Chiroptera: Macroglossinae) in Malaysia. Unpublished PhD Thesis, University of Aberdeen. EJH Corner. 1997. Wayside Trees of Malaya. United Selangor Press, Malaysia. Pp. 861. JV LaFrankie. 2010. Trees of Tropical Asia. Black Tree Publications, Philippines. pp.748.
ITS2	W3=11491; W6=3441; W7=10716	Myrtaceae	Syzygium	jambos	Jambu Mawar, Jambu Air Mawar, Rose Apple	native	3	22	matched to single species	100	Syzygium jambos	JX856511; KT970716; KC815991	Fragrant flowers.	Flower sporadically nearly all year round.	Cultivated for fruits as crops. Planted at backyard for fruits.	EJH Corner. 1997. Wayside Trees of Malaya. United Selangor Press, Malaysia. Pp. 861.
ITS2	W3=3518; W4=3435; W7=7275	Lythraceae	Sonneratia	caseolaris	Beremban	native	3	19	matched to single species	100	Sonneratia caseolaris	AY674904; AY680884; KX000451; KX000450; KX000449; KX000448; KX000447; KX000446	Flowers open at dusk, emitting a smell of sour milk and last for a night. Pollinated by bats which drink the nectar in the calyx-cup (Whitemore, 1972; Corner, 1997). Mangrove plants and grows at banks of tidal rivers. Petals are dark red, stamens are dark red at base and white above (Whitemore, 1972).	Flower continuously at Klang river (Start, 1974)	Firewoods and for bridges. Can be used as industrial pulp (Whitemore, 1972).	TC Whitmore. 1972. Sonneratiaceae. In: Tree Flora of Malaya: a Manual for Foresters. (eds: TC Whitemore). Longman, Malaysia.Vol 1: 442-445. A Start (1974). The feeding biology in relation to food sources of nectarivorous bats (Chiroptera: Macroglossinae) in Malaysia. Unpublished PhD Thesis, University of Aberdeen. EJH Corner. 1997. Wayside Trees of Malaya. United Selangor Press, Malaysia. Pp. 861.
ITS2	W1=9225; W10=4636	Malvaceae	Durio		Durian	native	2	96	matched to two species which occur in Peninsular Malaysia	100	Durio zibethinus; Durio lowianus	AF233304; AF233305; AF287711	Sour-smelling cream flowers bloom at night. Pollinated by bats.	Durio zibethinus flowers March-April and September-October (Start, 1974) though recent flowering seasons apperead to be April-May, July–August, and October–November (Aziz et al., 2017b). Durio graveolens flower from March to October (Start, 1974). Other Durio species flower April-July and September-November (Start, 1974).	Cultivated as crops. Fruits are eaten.	KM Kochumemen. 1972. Bombacaceae. In: Tree Flora of Malaya: a Manual for Foresters. (eds: TC Whitemore). Longman, Malaysia.Vol 1: 100-120. A Start (1974). The feeding biology in relation to food sources of nectarivorous bats (Chiroptera: Macroglossinae) in Malaysia. Unpublished PhD Thesis, University of Aberdeen. SA Aziz et al. (2017b). Pollination by the locally endangered island flying fox (Pte…
ITS2	W5=3106; W7=10318	Euphorbiaceae	Mallotus	paniculatus	Balik Angin	native	2	26	matched to two species but only one occurs in Peninsular Malaysia	100	Mallotus paniculatus; Mallotus apelta	KP09293; KP092936; KP092932	Male flowers are fluffy balls of stamens,very fragrant. Small tree which lives in full-sun, commonly found in open ground. Gregarious in secondary forest. Can be found in urban areas (Corner, 1997).	Flower throughout the year.	Very common in open ground, villages and by the edge of the forests in both lowlands and mountains through Malaya	EJH Corner. 1997. Wayside Trees of Malaya. United Selangor Press, Malaysia. Pp. 861. JV LaFrankie. 2010. Trees of Tropical Asia. Black Tree Publications, Philippines. pp.748. CM Boo, SYJ Chew, JWH Yong. 2014. Plants in Tropical Cities. 1st Edition. Pp.990.
ITS2	W7=15366; W9=10090	Euphorbiaceae	Croton	argyratus		native	2	4	matched to single species	100	Croton argyratus	HM564075; AB375093	Tree. Abundant and widespread gap plant of primary forests and also forest margins (LaFrankie, 2010). Common in open country and edge of forest. Brownish flowers. Resembles Mallotus (Corner, 1997).	Likely to flower throughout the year.		TC Whitemore. 1972. Euphorbiaceae. In: Tree Flora of Malaya: a Manual for Foresters. (eds: TC Whitemore). Vol 2: 34-136. JV LaFrankie. 2010. Trees of Tropical Asia. Black Tree Publications, Philippines. pp.748.
ITS2	W7=13835; W8=14334	Sapindaceae	Dimocarpus	longan	Mata Kucing	native	2	3	matched to single species	100	Dimocarpus longan	FJ980419; EU24356; EF532339; EF532338; EF488973; EF488972; EF532329; JN407535; EF53233	Flowers are large, white and fragrant.	appeared to be seasonal, flowering once a year from February to April.	Common in villages, gardens and roadsides. Planted at backyard for fruits. Cultivated for fruits as crops.	EJH Corner. 1997. Wayside Trees of Malaya. United Selangor Press, Malaysia. Pp. 861.
ITS2	W8=14653; W10=24113	Moraceae	Ficus	calcicola		native	2	2	matched to single species	100	Ficus calcicola	EU091581	Occurs at limestone hills and has been recorded from Selangor (Kochummen, 1978).			KM Kochummen. 1978. Moraceae. In: Tree Flora of Malaya: a Manual for Foresters. (eds: TC Whitemore). Longman, Malaysia.Vol 3: 119-168.
ITS2	W5=8455; W6=17825	Fabaceae	Bauhinia	strychnoidea		native	2	2	matched to single species	100	Bauhinia strychnoidea	AY258406	Creeper. Habitat is usually limestone hills. Recorded from Batu Caves (Ridley, 1922).			HN Ridley - in Fl. Malay Penins. 1922: Vol 1, 633
ITS2	W7=15313	Moraceae	Artocarpus	elasticus	Terap Nasi, Terap	native	1	6	matched to single species	100	Artocarpus elasticus	KU855496	Male flower heads have no scent but give off clouds of pollen when tapped, therefore presumed to be wind-pollinated (Corner, 1997). Medium tree. Common in lowland forest and open country (Kochummen, 1978).	Seasonal. Flowers twice a year at January to February and July to August (Corner, 1997).	Fruits are eaten as vegetable and barks are traditionally used in wall-making, as string and fish net, as clothes by jungle folks, for lining baskets and bin by Malays (Mohd-Tamin, 1991; Corner, 1997). As timber (Kochummen, 1978). Wayside tree. Garden plant.	KM Kochummen. 1978. Moraceae. In: Tree Flora of Malaya: a Manual for Foresters. (eds: TC Whitemore). Longman, Malaysia.Vol 3: 119-168. N Mohd-Tamin. 1991. 100 Spesis tumbuhan di Malaysia. Jabatan Hal Ehwal Awam Syarikat-Syarikat Shell, Malaysia. pp. 101. EJH Corner. 1997. Wayside Trees of Malaya. United Selangor Press, Malaysia. Pp. 861. CM Boo, K Omar-Hor, CL Ou-Yang. 2006. 1001 Garden Plants in…
ITS2	W1=2836	Moraceae	Ficus	benjamina	Beringin, Waringin	native	1	5	matched to single species	100	Ficus benjamina	JN117620; JQ773840	Strangling fig and is very destructive. In urban areas, commonly occur on trees that are often used by birds as roost or perch. Dispersed by birds. At Indian and Sumatra, the fig-wasp is Blastophaga (Eupristina) adempta.	Seldom observed to be blooming	Commonly planted at roadsides as shade and ornamental trees.	KM Kochummen. 1978. Moraceae. In: Tree Flora of Malaya: a Manual for Foresters. (eds: TC Whitemore). Longman, Malaysia.Vol 3: 119-168. EJH Corner. 1997. Wayside Trees of Malaya. United Selangor Press, Malaysia. Pp. 861.
ITS2	W7=10578	Sapotaceae	Mimusops	elengi	Bunga Tanjung	native	1	5	matched to single species	100	Mimusops elengi	KF686245; HF542849	Tree. Fragrant flowers with white petals (Corner, 1997).	generally in flower or fruit (Corner, 1997).	Commonly planted in villages, gardens, roadsides and on the shore. Ornamental flower. Edible fruit. Traditional medicine. Flowers were traditionally used as fragrance.	N Mohd-Tamin. 1991. 100 Spesis tumbuhan di Malaysia. Jabatan Hal Ehwal Awam Syarikat-Syarikat Shell, Malaysia. pp. 101. EJH Corner. 1997. Wayside Trees of Malaya. United Selangor Press, Malaysia. Pp. 861. CM Boo, K Omar-Hor, CL Ou-Yang. 2006. 1001 Garden Plants in Singapore (2nd. Edition). National Parks, Singapore. Pp. 780. CM Boo, SYJ Chew, JWH Yong. 2014. Plants in Tropical Cities. 1st Edition…
ITS2	W8=19053	Cannabaceae	Trema	cannabina	Menerong, Mengkirai	native	1	4	matched to single species	100	Trema cannabina	KP093174	Trema trees are often found along logging roads and at sites which have been degraded by road-making, burning, cultivation an erosion. (Soepadmo, 1972). First to grow in cleared forests. Quick-grower. Short-lived. Common. Small tree. Flowers are pale green.	Flower throughout the year.	Wayside tree.	E Soepadmo.1972. Ulmaceae. In: Tree Flora of Malaya: a Manual for Foresters. (eds: TC Whitemore). Vol 2: 413-423. EJH Corner. 1997. Wayside Trees of Malaya. United Selangor Press, Malaysia. Pp. 861.
ITS2	W4=2597	Gentianaceae	Limahlania	crenulata	Malabera, Birah	native	1	4	matched to single species	100	Fagraea crenulata=Limahlania crenulata	JX283366	Grows in swampy places in west side of Peninsular Malaysia. Flowers are cream-coloured turning yellowish, fragrant and nocturnal. Flowers are pollinated by nocturnal moths (Corner, 1997). Tree.	Flowers about March or April and perhaps again later the year (Corner, 1997).	Planted in Kuala Lumpur (Corner, 1997)	EJH Corner. 1997. Wayside Trees of Malaya. United Selangor Press, Malaysia. Pp. 861. CM Boo, K Omar-Hor, CL Ou-Yang. 2006. 1001 Garden Plants in Singapore (2nd. Edition). National Parks, Singapore. Pp. 780. CM Boo, SYJ Chew, JWH Yong. 2014. Plants in Tropical Cities. 1st Edition. Pp.990.
ITS2	W4=8571	Asteraceae	Bidens	pilosa	Rumput Juala	native	1	1	matched to two species but only one occurs in Peninsular Malaysia according to Ridley (1923) and http://www.mybis.gov.my/	100	Bidens pilosa; Bidens alba	FJ980316; GU724272; EF107649	Common in open damp spots. Recorded from Batu Caves	Flower continuously		HN Ridley - in Fl. Malay Penins. 1923: Vol 2, 183
ITS2	W6=4700	Amaranthaceae	Cyathula	prostrata		native	1	1	matched to single species	100	Cyathula prostrata	AY174421	Herbs. Weed. Attracts butterflies. Very fine flowers. Cultivar.		Ground cover. Herbs & spices. Ornamental foliage. Commercialised as garden plants. Herbarium specimens were collected from limestone hills.	CM Boo, K Omar-Hor, CL Ou-Yang. 2006. 1001 Garden Plants in Singapore (2nd. Edition). National Parks, Singapore. Pp. 780. CM Boo, SYJ Chew, JWH Yong. 2014. Plants in Tropical Cities. 1st Edition. Pp.990. FSP Ng. 2010. Tropical Horticulture & Gardening. MPH, Malaysia. Pp.361. Herbarium, University of Malaya
ITS2	W9=9247	Sapindaceae	Nephelium	ramboutan-ake	Pulasan	native	1	1	matched to single species	100	Nephelium ramboutan-ake	JQ807599	Greenish-white fragrant flowers.	Flower during June and August.	Cultivated for fruits as crops. Planted at backyard for fruits. Common in villages and orchards. Seeds can be boiled or roasted for the preparation of a dish like cocoa.	EJH Corner. 1997. Wayside Trees of Malaya. United Selangor Press, Malaysia. Pp. 861.
ITS2	W5=8213	Lythraceae	Lagerstroemia	speciosa	Bungor, Bungor Raya	native	1	1	matched to single species	100	Lagerstroemia speciosa	KX534376	Deciduous. A tree with dense, bushy rounded crown, 50ft in open area and 100ft in forest. Flowering begins at age of 3-4 years. Flowers begin to at ~4am, or even earlier, and are fully open at sunrise. Most flowers fall off during second or third day (Corner, 1997). Pollination is presumed to be by bees (LaFrankie, 2010). Scentless flowers	Flower several times a year in Singapore.	Planted extensively at roadside and in garden. In wild, often massed at riverbank (Corner, 1997). Wood can be used for construction of house and boats. Barks and leaves were used in traditional medicine (Mohd-Tamin, 1991).	N Mohd-Tamin. 1991. 100 Spesis tumbuhan di Malaysia. Jabatan Hal Ehwal Awam Syarikat-Syarikat Shell, Malaysia. pp. 101. EJH Corner. 1997. Wayside Trees of Malaya. United Selangor Press, Malaysia. Pp. 861. JV LaFrankie. 2010. Trees of Tropical Asia. Black Tree Publications, Philippines. pp.748.
rbcL	W7=318	Athyriaceae	Diplazium	esculentum		native	1	1	matched to single species	100	Diplazium esculentum	KC254406; AB574969; AB042736; DEU05619
ITS2	W1=10440; W3=1888; W5=6210; W6=1324; W7=11753; W8=10043; W9=10893; W10=10069	Rubiaceae	Urophyllum	leucophlaeum		native, endemic	8	298	matched to single species	100	Urophyllum leucophlaeum	HM042469	Dioecious. Shrub or small tree up to 6 m. Hill to montane forest. Recorded from Perak, Selangor, Melaka, Terengganu, Pahang.			KM Wong. 1989. Rubiaceae. In: Tree Flora of Malaya: a Manual for Foresters. (eds: TC Whitemore). Longman, Malaysia.Vol 4: 324-425.
ITS2	W2=1706; W4=2363; W5=8320; W7=16652; W8=14285; W9=10909; W10=12802	Euphorbiaceae	Macaranga				7	47	matched to multiple species	100	Macaranga tanarius; Macaranga clavata; Macaranga cf. brachytricha; Macaranga ducis	DQ866584; DQ866585; DQ866543; DQ866541; DQ866549	Fast-grower. Occurs at open area exposed to full sun with degraded soil. Nothing much known about the pollination. Without ants. Likely to be pollinated by thrips (LaFrankie 2010) or hemiptera which feeds on thrips (Ishida et al., 2009). Most widely spread species. Common in open country, near the sea and abundant on Penang Hill . Flowers are pale green (Corner 1997).		Wayside tree (Corner, 1988).	EJH Corner. 1997. Wayside Trees of Malaya. United Selangor Press, Malaysia. Pp. 861. Ishuda et al. 2009. Annals of Botany. 103:39-44. JV LaFrankie. 2010. Trees of Tropical Asia. Black Tree Publications, Philippines. pp.748.
ITS2	W1=5661; W2=2674; W3=13913; W4=7821; W5=9347; W5=11467; W9=10251	Musaceae	Musa		Banana		6	4144	matched to multiple species and cultivars which occur in Peninsular Malaysia	100	Musa acuminata; Musa AB Group cultivar	KT257609; KT257608; KY710761		Musa spp. appear to flower continously.	Cultivated for fruits as crops. Planted at backyard for fruits.
ITS2	W1=2633; W8=10691	Moraceae	Ficus				2	75	matched to two species which occur in Peninsular Malaysia	100	Ficus concinna; Ficus virens	JN117626; JQ773856;	Corner (1997) described the pollination of Ficusin details, emphasizing on the role of fig-wasps in pollinating the figs (as the flowers are in the figs). The role of the bats are never mentioned and hence, the presence of 3 Ficus species in the faeces of Cave Nectar Bats remained to be determined. Corner mentioned that birds disperse the seeds.		Provides food for birds and small mammals such as monkeys and squirrels which in return, disperse the seeds.	KM Kochummen. 1978. Moraceae. In: Tree Flora of Malaya: a Manual for Foresters. (eds: TC Whitemore). Longman, Malaysia.Vol 3: 119-168. EJH Corner. 1997. Wayside Trees of Malaya. United Selangor Press, Malaysia. Pp. 861.
ITS2	W1=150; W7=4987	Rutaceae	Citrus				2	2	matched to multiple species and cultivars	100	Citrus medica; Citrus limon; Citrus jambhiri; Citrus maxima; Citrus aurantiifolia	JF421486; FJ980439; JN681159; JN681156; FJ641966	Flowers are white and fragrant. Very difficult to distinguish morphologically too due to the extent of hybridisation.		Many species have been hybridised, often due to cultivation as crops.	EJH Corner. 1997. Wayside Trees of Malaya. United Selangor Press, Malaysia. Pp. 861.
ITS2	W7=1943; W10=5756	Araliaceae	Schefflera				2	2	matched to multiple species which occur in Peninsular Malaysia	100	Schefflera elliptica; Schefflera petelotii; Schefflera pubigera; Schefflera pauciflora	KC952389; KC952358; KC952325; KC952380; KC952365; KC952342	The native Schefflera are S. heterophylla and S. latifoliolata which are common in forests (Corner, 1997). Shrub & Tree. Only S. actinolophylla flowers, is a tree and attract birds. S. arboricola & elegantissimaare ornamental shrubs.		Ornamental flower and foliage. Commercialised as garden plants.	EJH Corner. 1997. Wayside Trees of Malaya. United Selangor Press, Malaysia. Pp. 861. CM Boo, SYJ Chew, JWH Yong. 2014. Plants in Tropical Cities. 1st Edition. FSP Ng. 2010. Tropical Horticulture & Gardening. MPH, Malaysia.
ITS2	W7=3602	Lamiaceae	Vitex		Leban, Halban		1	3	matched to multiple species which occur in Peninsular Malaysia	100	Vitex pinnata; Vitex limonifolia; Vitex parviflora	JX856528; FM200120; LT21644	Very common tree of secondary jungle.		Ornamental flower. Timber. Traditional medicine.	N Mohd-Tamin. 1991. 100 Spesis tumbuhan di Malaysia. Jabatan Hal Ehwal Awam Syarikat-Syarikat Shell, Malaysia. pp. 101. EJH Corner. 1997. Wayside Trees of Malaya. United Selangor Press, Malaysia. Pp. 861. JV LaFrankie. 2010. Trees of Tropical Asia. Black Tree Publications, Philippines. pp.748. CM Boo, SYJ Chew, JWH Yong. 2014. Plants in Tropical Cities. 1st Edition. Pp.990.
ITS2	W3=8915	Zingiberaceae	Etlingera				1	1	matched to two species which occur in Peninsular Malaysia	100	Etlingera hemisphaerica; Etlingera elatior	AF414507; AF414470; AF414465; AB097230	Reddish or yellowish tubular floers, 0-2m above ground, diurnal anthesis and nectar production (Poulse, 2006).Flowers produce large amount of nectar and are pollinated by spiderhunters Arachnida longirostra		Likely to be the E. elatior which is widely cultivated in Peninsular Malaysia.	S Sakai, H Nagamasu. 2003. Systematic studies of Bornean Zingiberaceae. Sakai et al. 1999. Three pollination guilds and variation in floral characteristics of Bornean gingers…. AX Poulsen. 2006. Etlingera of Borneo. Natural History Publications (Borneo), Malaysia pp. 263
ITS2	W1=833	Rosaceae	Pyrus				1	1	matched to single species but several cultivar are normaly planted at backyard garden in Peninsular Malaysia	100	Pyrus communis	EU150010	There is only wild Malayan Pyrus is the P. corymbifera which occurs in the mountains, and has been recorded from Fraser's Hill. P. corymbifera flowers twice a year in February and August or September. There was said to be a tree of Chinese Pear, P. lindleyi which fruited continously on Taiping Hill (Corner, 1997). People plant Pyrus cultivar at backyard.			EJH Corner. 1997. Wayside Trees of Malaya. United Selangor Press, Malaysia. Pp. 861.
rbcL	W1=1303; W2=1838; W3=1058; W4=1108; W5=3270; W7=3368; W9=3278; W10=1760	Gleicheniaceae	Dicranopteris				8	53	matched to multiple species which occur in Peninsular Malaysia	100	Dicranopteris linearis; Dicranopteris cadetii; Dicranopteris gigantea; Dicranopteris ampla; Dicranopteris pedata	AB981739; AB889467; KF992471; DQ838072; DQ838071; DQ838070	Common as thickets in open places and at roadsides.		Traditional medicine for fever. Stems are wovem into matting and used to make walls, fish-traps, chair seats, capts and even ropes.	AG Piggot. 1996. Ferns of Malaysia in colour. Tropical Press, Malaysia. Pp. 458.
rbcL	W1=4400; W3=1821; W4=1175; W6=137; W7=2517; W8=1178; W9=1539	Cyatheaceae					7	56	matched to multiple genera which occur in Peninsular Malaysia	100	Sphaeropteris horrida; Sphaeropteris quindiuensis; Alsophila spinulosa; Cyathea lepifera; Cyathea robusta; Cyathea mertensiana	KP985731; KR082863; KJ688107; KJ688102; JF950807; AB574752	Tree ferns. Trunk aprx and stipes scaly. Sori on veins but never terminal. Fronds twice or more pinnate. Sporangia on raised receptacle.			A. Johnson. 1959. A student's guide to the ferns of Singapore Island. Malayan Nature Society, Kuala Lumpur, Malaysia. Pp. 223.
rbcL	W1=3270; W7=1528; W8=2956; W9=3909; W10=1438	Thelypteridaceae					5	51	matched to multiple genera which occur in Peninsular Malaysia	100	Pneumatopteris truncata; Pronephrium articulatum; Thelypteris taiwanensis; Crocosmia x crocosmiiflora; Pronephrium megacuspe	JN572363; JN572364; AB575042; KX518295; JN572369
rbcL	W5=3602; W7=540; W8=1576; W9=2091	Arecaceae					4	14	matched to multiple genera which occur in Peninsular Malaysia	100	Archontophoenix sp.; Veitchia sp.; Ptychosperma sp.; Elaeis guineensis; Elaeis oleifera; Podococcus sp.	KX587883; KX587792; KX587753; KX587762; GQ981726; KX587945		Cocos nucifera and Arenga spp. bloom throughout the year		A Start (1974). The feeding biology in relation to food sources of nectarivorous bats (Chiroptera: Macroglossinae) in Malaysia. Unpublished PhD Thesis, University of Aberdeen.
rbcL	W3=469; W6=884; W10=1133	Lejeuneaceae					3	8	matched to multiple genera which occur in Peninsular Malaysia	100	Omphalanthus ovalis; Omphalanthus filiformis; Leucolejeunea xanthocarpa; Cheilolejeunea clausa; Cheilolejeunea acutangula	DQ983717; DQ983716; DQ983700; DQ983665; DQ983664	Mosses and Liverworts
rbcL	W7=2133	Dryopteridaceae	Pleocnemia				1	2	matched to multiple species which occur in Peninsular Malaysia	100	Pleocnemia presliana; Pleocnemia irregularis; Pleocnemia cumingiana	KT831869; KJ196842; KJ196830	3 species in Malaya. Fronds bipinnate-tripinnatifid, the basal basiscopic pinnules of the basal pinnae much longer than the rest. Sori with reniform indusia or without indusia, not terminal on the veins.			RE Holttum. 1968. Ferns of Malaya. In: Flora of Malaya. Vol 2. Government Printing Office, Singapore. pp.653.
rbcL	W8=3276	Pteridaceae	Adiantum				1	1	matched to multiple species which occur in Peninsular Malaysia	100	Adiantum menglianense; Adiantum malesianum; Adiantum philippense	KU945417; KP637231; JF935299	Leaflets fan-shaped. Frond bipinnate with lower three to five pinnules of each pinna subdivided into leaflets resembling the upper pinnules.			A. Johnson. 1959. A student's guide to the ferns of Singapore Island. Malayan Nature Society, Kuala Lumpur, Malaysia. Pp. 223.
